# Supplementary material for: Improvement of Ferulic Acid Antioxidant Activity by Multiple Emulsions: In Vitro and In Vivo Evaluation
Source: MDPI journal article supplement (doi:10.3390/nano11020425), 2021-02-08
Supplement: s1 [file s1]

# Improvement of Ferulic Acid Antioxidant Activity by Multiple Emulsions: In Vitro and In Vivo Evaluation

Antonia Mancuso <sup>1</sup>, Maria Chiara Cristiano <sup>2</sup>, Rosanthy Pandolfo <sup>1</sup>, Manfredi Greco <sup>3</sup>, Massimo Fresta <sup>1</sup> and Donatella Paolino <sup>2,\*</sup>

<sup>1</sup> Department of Health Sciences, University "Magna Græcia" of Catanzaro, Campus Universitario "S. Venuta", 88100 Catanzaro, Italy; antonia.mancuso@unicz.it (A.M.); rosantony.pandolfo@unicz.it (R.P.); fresta@unicz.it (M.F.)

<sup>2</sup> Department of Experimental and Clinical Medicine, University "Magna Græcia" of Catanzaro, Campus Universitario "S. Venuta", 88100 Catanzaro, Italy; mchiara.cristiano@unicz.it

<sup>3</sup> Plastic Surgery Unit, Department of Clinical and Experimental Medicine, "Magna Graecia" University, 88100 Catanzaro, Italy; manfredigreco@unicz.it

\* Correspondence: paolino@unicz.it; Tel.: +39-0961-3694211

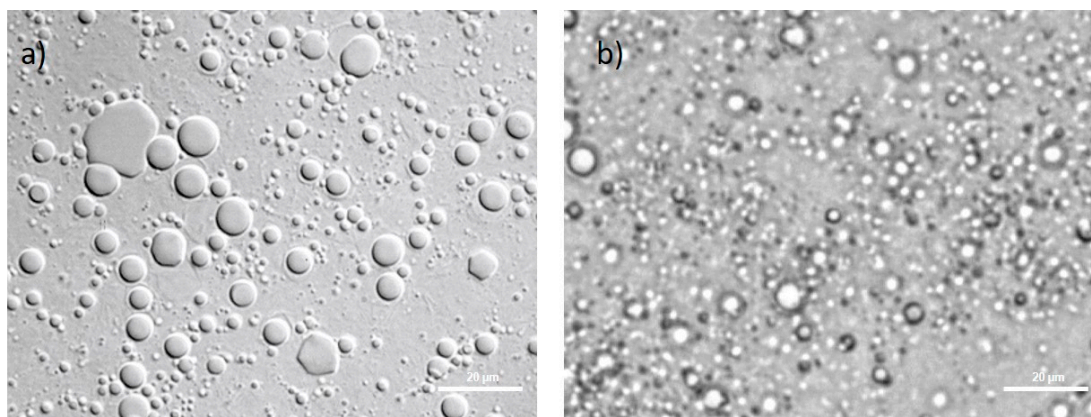

**Figure S1.** Photomicrographs of O/W (a) and W/O (b) simple emulsions after 6 h from their preparation.

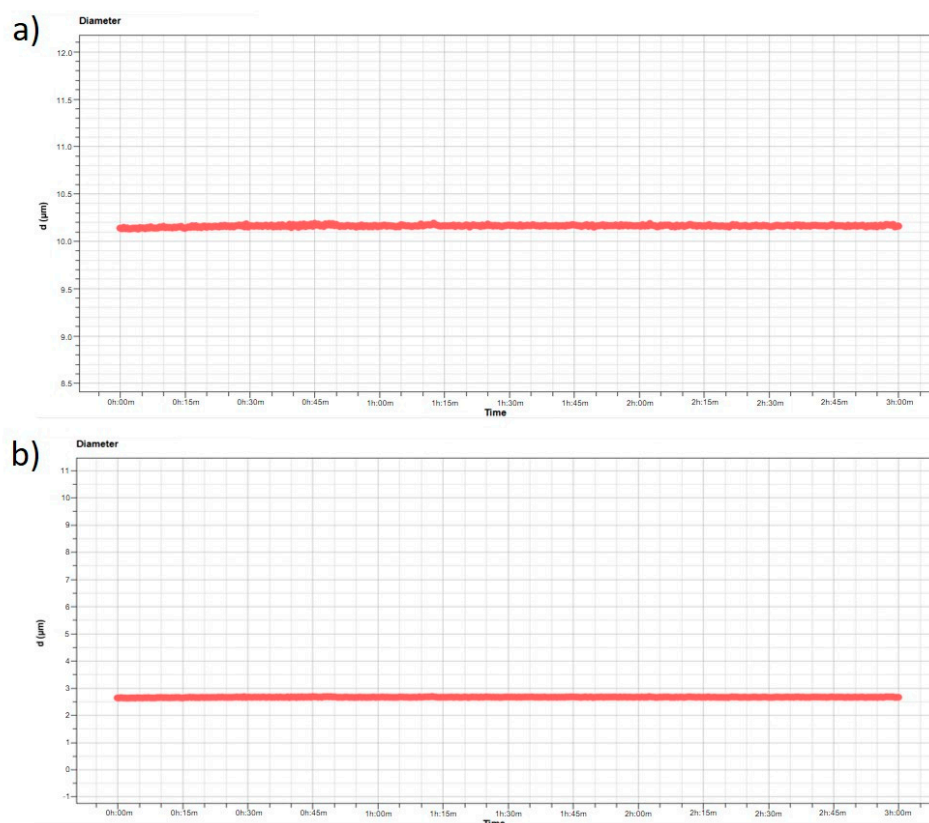

**Figure S2.** Diameter kinetic profile of O/W (a) and W/O (b) simple emulsions as a function of time (0–3 h). Data are representative of three independent experiments.

**Table S1.** Values of variation of the Erythema Index ( $\Delta E.I.$ ) of skin sites following the skin topical treatment with empty formulations. Data were expressed as mean values of twelve different experiments  $\pm$  standard deviations.

| Time (h) | Saline solution | ME             | O/W            | W/O           |
|----------|-----------------|----------------|----------------|---------------|
| 6        | $7.8 \pm 0.9$   | $8.0 \pm 1.5$  | $11.0 \pm 1.0$ | $7.0 \pm 0.7$ |
| 24       | $8.9 \pm 1.0$   | $9.0 \pm 1.0$  | $10.0 \pm 1.5$ | $9.0 \pm 0.5$ |
| 48       | $8.2 \pm 1.0$   | $10.0 \pm 0.9$ | $9.0 \pm 1.0$  | $8.0 \pm 0.8$ |
| 72       | $9.3 \pm 0.1$   | $9.0 \pm 0.9$  | $7.0 \pm 1.7$  | $8.0 \pm 1.0$ |
